# Supplementary material for: Vinculin association with actin cytoskeleton is necessary for stiffness-dependent regulation of vinculin behavior
Source: PubMed Central journal article supplement (PMC5384775; doi:10.1371/journal.pone.0175324), 2017-04-07

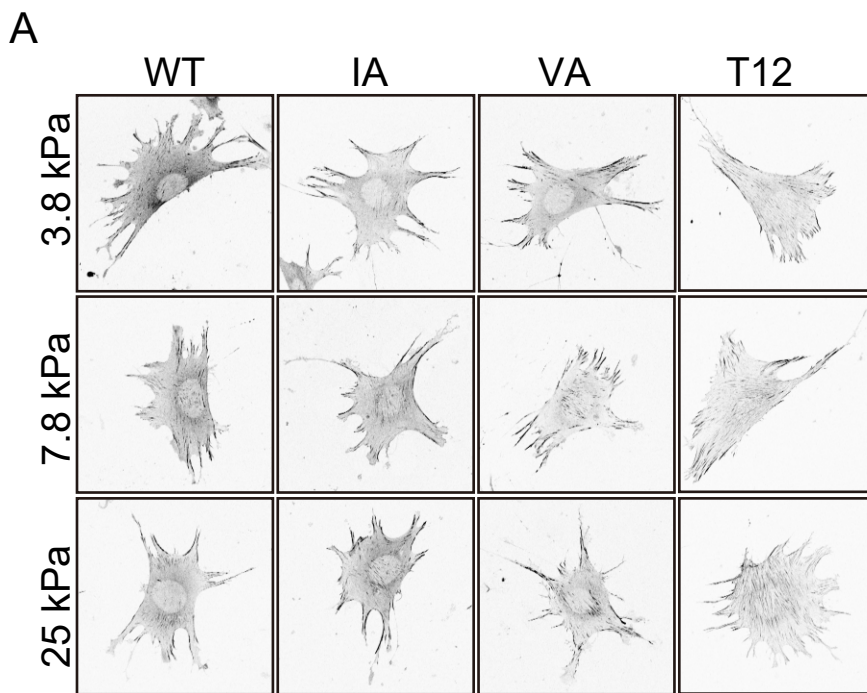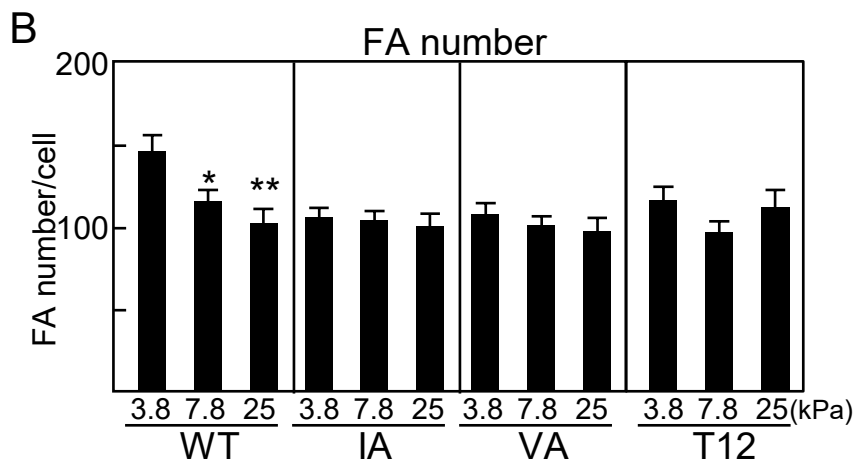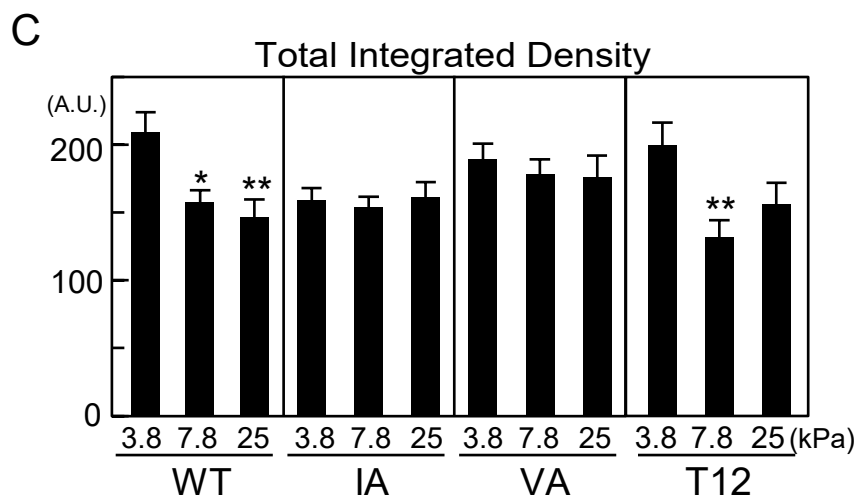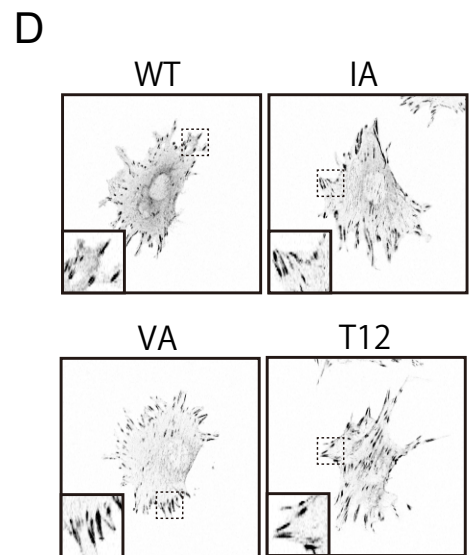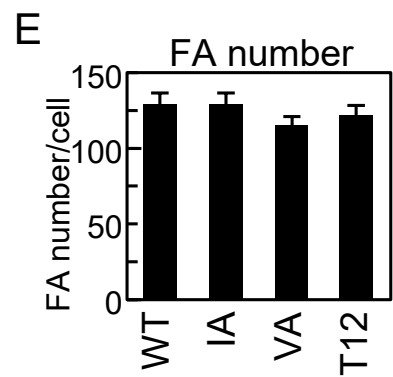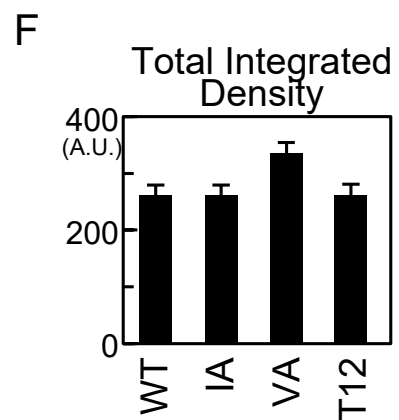

Supplement: pone.0175324.s002.pdf [file pone.0175324.s002.pdf]
