# Supplementary material for: Vinculin association with actin cytoskeleton is necessary for stiffness-dependent regulation of vinculin behavior
Source: PubMed Central journal article supplement (PMC5384775; doi:10.1371/journal.pone.0175324), 2017-04-07
Supplement: pone.0175324.s004.pdf [file pone.0175324.s004.pdf]

A

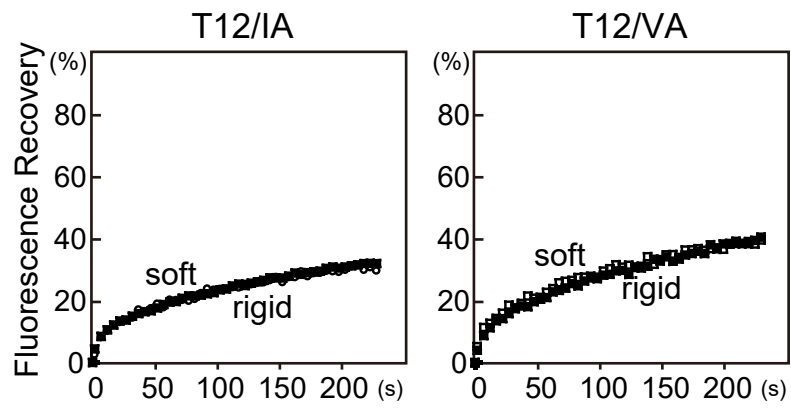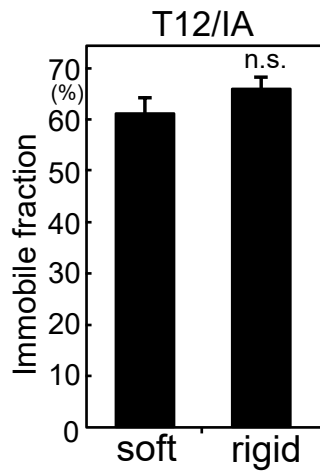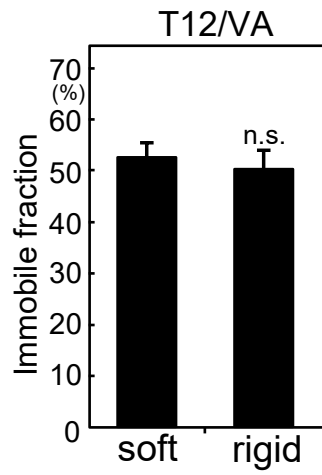

B

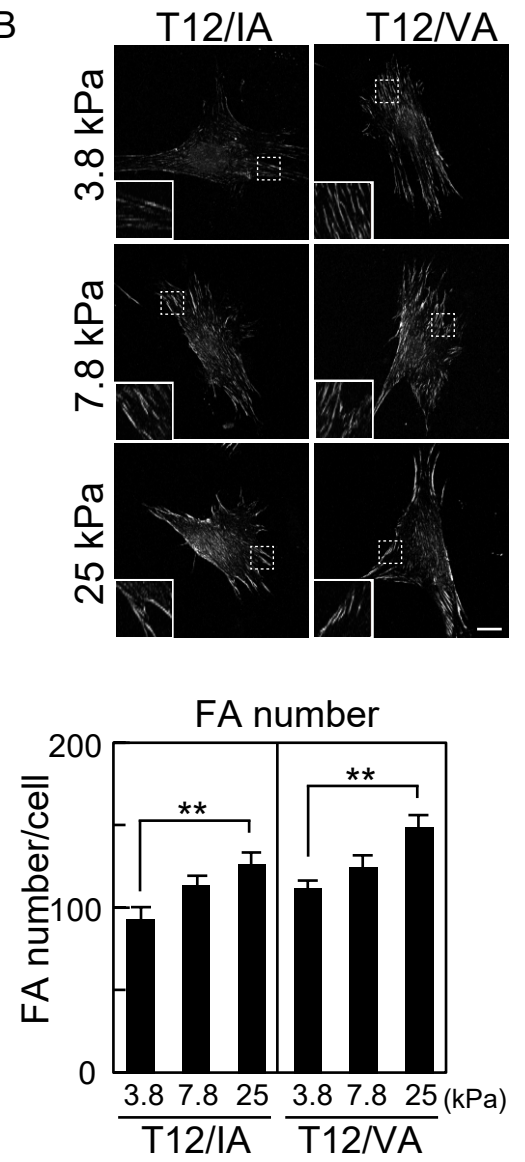

S4 Fig
